# Supplementary material for: Combining genomics and epidemiology to track mumps virus transmission in the United States
Source: PLoS Biol. 2020 Feb 11;18(2):e3000611. doi: 10.1371/journal.pbio.3000611 (PMC7012397; doi:10.1371/journal.pbio.3000611)
Supplement: S1 Data — Information and metadata regarding all mumps PCR-positive and PCR-negative samples on which sequencing was attempted. PCR, polymerase chain reaction. (XLSX) [file pbio.3000611.s015.xlsx]

## Sheet: Mumps sample data
Sample Information						qPCR assay data					Sequencing method				Sample metadata
No.	Name	Genome	Accession	Genotype	Source	Source Ct (MuV)	Broad Ct (MuV)	MuV cp/µL	18S cp/µL	23S cp/µL	Depletion†	Capture†	Unambig. Bases	Median coverage	Symptom onset date	Collection date	Location	Age	Gender	Fever	Orchitis	Parotitis	Vaccine status	Years since vax	Travel history
1	MuVs/Massachusetts.USA/8.16/[G]	No*	MF965240	G	MDPH	31.85	33.13	1.1	5616	3982382	Bacterial	None	10605	5	2016-02-21	2016-02-24	Massachusetts.USA	24	Female	Unknown	n/a	Yes	2 MMR	20–24	None
2	MuVs/Massachusetts.USA/8.16/2[G]	Yes	MF965234	G	MDPH	23.05	26.01	123.47	582	180111	Bacterial	None	15306	219	2016-02-23	2016-02-24	Massachusetts.USA	21	Female	Yes	n/a	Yes	2 MMR	15–19	None
3	MuVs/Massachusetts.USA/8.16/3[G]	Yes	MF965254	G	MDPH	28.69	30.01	8.67	1968	61729	Bacterial	V-MM	15254	58	2016-02-24	2016-02-25	Massachusetts.USA	21	Male	Yes	No	Yes	2 MMR	10–14	None
4	MuVs/Massachusetts.USA/8.16/4	No	n/a	Unknown	MDPH	29.79	ND	ND	5046	25873105	Bacterial	None	524	2	2016-02-24	2016-02-25	Massachusetts.USA	20	Male	No	No	Yes	2 MMR	15–19	None
5	MuVs/Massachusetts.USA/8.16/5[G]	Yes	MF965268	G	MDPH	24.56	26.29	102.29	–	–	Bacterial	V-All	15305	223	2016-02-21	2016-02-25	Massachusetts.USA	20	Female	Unknown	n/a	Yes	2 MMR	15–19	None
6	MuVs/Massachusetts.USA/8.16/6[G]	Yes	MF965235	G	MDPH	25.47	26.91	67.82	3838	777417	Bacterial	None	15309	140	2016-02-25	2016-02-27	Massachusetts.USA	20	Male	Unknown	No	Yes	2 MMR	15–19	Out of state
7	MuVs/Massachusetts.USA/9.16/[G]	Yes	MF965227	G	MDPH	24.22	24.16	420.53	12967	2329055	Bacterial	V-MM	15322	8203	2016-03-01	2016-03-02	Massachusetts.USA	24	Female	Yes	n/a	Yes	2 MMR	15–19	None
8	MuVs/Massachusetts.USA/9.16/2[G]	Yes	MF965302	G	MDPH	25.98	27.96	33.77	21268	40463928	Bacterial	V-MM	15307	113	2016-03-06	2016-03-06	Massachusetts.USA	20	Female	No	n/a	Yes	2 MMR	5–9	None
9	MuVs/Massachusetts.USA/9.16/3[G]	Yes	MF965286	G	MDPH	21.07	24.24	398.4	5413	45150245	None	None	15215	18	2016-03-04	2016-03-05	Massachusetts.USA	25	Female	No	n/a	Yes	2 MMR	15–19	None
10	MuVs/Massachusetts.USA/10.16/[G]	Yes	MF965266	G	MDPH	19.67	22.42	1339.54	14215	91817830	Bacterial	V-All	15308	390	2016-03-06	2016-03-07	Massachusetts.USA	20	Male	Yes	No	Yes	2 MMR	15–19	None
11	MuVs/Massachusetts.USA/10.16/2[G]	Yes	MF965225	G	MDPH	22.41	24.83	269.96	14158	2203610	Bacterial	V-All	15315	744	2016-03-07	2016-03-08	Massachusetts.USA	21	Male	Unknown	No	Yes	2 MMR	15–19	None
12	MuVs/Massachusetts.USA/9.16/4[G]	Yes	MF965197	G	MDPH	27.01	29.08	16.04	22878	29432297	Bacterial	V-MM	15289	78	2016-03-04	2016-03-08	Massachusetts.USA	27	Male	Unknown	No	Yes	2 MMR	15–19	None
13	MuVs/Massachusetts.USA/10.16/3[G]	Yes	MF965298	G	MDPH	23.38	24.23	402.25	132062	51975703	Bacterial	V-All	15304	204	2016-03-08	2016-03-09	Massachusetts.USA	22	Male	Unknown	No	Yes	2 MMR	15–19	None
14	MuVs/Massachusetts.USA/10.16/4[G]	Yes	MF965318	G	MDPH	25.05	23.54	634.05	–	–	None	None	15307	334	2016-03-09	2016-03-10	Massachusetts.USA	20	Male	Unknown	No	Yes	2 MMR	15–19	None
15	MuVs/Massachusetts.USA/10.16/5[G]	No*	MF965253	G	MDPH	31.63	32.14	2.18	11669	2420350	Bacterial	None	10180	4	2016-03-07	2016-03-10	Massachusetts.USA	21	Male	No	No	Yes	2 MMR	15–19	None
16	MuVs/Massachusetts.USA/10.16/6[G]	Yes	MF965205	G	MDPH	26.61	26.78	74.68	1789	1886804	None	None	15305	70	2016-03-09	2016-03-09	Massachusetts.USA	21	Female	No	n/a	Yes	2 MMR	15–19	None
17	MuVs/Massachusetts.USA/10.16/7[G]	Yes	MF965264	G	MDPH	27.14	26.49	89.46	50033	66348390	Bacterial	V-MM	15302	106	2016-03-09	2016-03-10	Massachusetts.USA	21	Female	No	n/a	Yes	2 MMR	5–9	None
18	MuVs/Massachusetts.USA/10.16/8[G]	Yes	MF965310	G	MDPH	27.23	24.95	248.61	7797	14446711	Bacterial	V-MM	15307	894	2016-03-11	2016-03-12	Massachusetts.USA	19	Female	Yes	n/a	Yes	2 MMR	15–19	Out of country
19	MuVs/Massachusetts.USA/10.16/9[G]	Yes	MF965270	G	MDPH	30.08	29.03	16.69	2375	525956	Bacterial	None	15300	68	2016-03-07	2016-03-10	Massachusetts.USA	26	Female	Yes	n/a	Yes	2 MMR	20–24	None
20	MuVs/Massachusetts.USA/10.16/10[G]	Yes	MF965219	G	MDPH	26.39	24.84	267.25	3906	5699568	Bacterial	None	15309	653	2016-03-11	2016-03-12	Massachusetts.USA	21	Male	No	No	Yes	2 MMR	15–19	None
21	MuVs/Massachusetts.USA/10.16/11[G]	No*	MF965216	G	MDPH	30.5	31.92	2.46	6028	32340015	Bacterial	None	4607	3	2016-03-10	2016-03-11	Massachusetts.USA	23	Male	Yes	No	Yes	2 MMR	15–19	None
22	MuVs/Massachusetts.USA/10.16/12[G]	Yes	MF965244	G	MDPH	23.41	24.87	262.77	1159	549747	Bacterial	None	15311	597	2016-03-12	2016-03-12	Massachusetts.USA	21	Female	Yes	n/a	Yes	2 MMR	15–19	None
23	MuVs/Massachusetts.USA/10.16/13[G]	Yes	MF965218	G	MDPH	28.89	30.94	4.68	72052	4996306	Bacterial	None	15128	13	2016-03-12	2016-03-14	Massachusetts.USA	19	Male	Unknown	Unknown	Yes	2 MMR	15–19	None
24	MuVs/Massachusetts.USA/11.16/[G]	Yes	MF965215	G	MDPH	25.63	25.56	166.63	5120	38607735	Bacterial	V-MM	15302	403	2016-03-14	2016-03-14	Massachusetts.USA	21	Male	Yes	No	Yes	2 MMR	15–19	None
25	MuVs/Massachusetts.USA/11.16/2[G]	Yes	MF965220	G	MDPH	29.04	29.14	15.46	445169	114312190	Bacterial	V-All	15214	24	2016-03-14	2016-03-15	Massachusetts.USA	21	Male	Yes	Unknown	Yes	2 MMR	15–19	None
26	MuVs/Massachusetts.USA/10.16/14[G]	Yes	MF965248	G	MDPH	27.47	27.81	37.37	35926	22311372	Bacterial	V-MM	15296	152	2016-03-12	2016-03-15	Massachusetts.USA	15	Female	Yes	n/a	Yes	2 MMR	10–14	None
27	MuVs/Massachusetts.USA/11.16/3[G]	Yes	MF965291	G	MDPH	24.05	25.76	145	10424	284420900	Bacterial	V-MM	15266	40	2016-03-15	2016-03-16	Massachusetts.USA	19	Female	No	n/a	Yes	2 MMR	10–14	None
28	MuVs/Massachusetts.USA/11.16/4[G]	Yes	MF965277	G	MDPH	26	27.26	53.79	178600	38726472	Bacterial	V-MM & V-All	15307	436	2016-03-17	2016-03-18	Massachusetts.USA	21	Male	Unknown	Unknown	Yes	2 MMR	15–19	Out of state/country
29	MuVs/Massachusetts.USA/11.16/5[G]	Yes	MF965275	G	MDPH	29.08	30.16	7.86	13904	80008655	Bacterial	V-All	14282	8	2016-03-19	2016-03-20	Massachusetts.USA	21	Male	Yes	No	Yes	2 MMR	15–19	Out of country
30	MuVs/Massachusetts.USA/12.16/[G]	Yes	MF965287	G	MDPH	23.2	25.95	128.12	83670	3691503	Bacterial	None	15304	217	2016-03-20	2016-03-23	Massachusetts.USA	23	Female	No	n/a	Yes	2 MMR	15–19	None
31	MuVs/Massachusetts.USA/12.16/2[G]	Yes	MF965256	G	MDPH	24.04	26.16	111.63	8347	1210776	Bacterial	V-All	15309	481	2016-03-22	2016-03-24	Massachusetts.USA	21	Male	No	No	Yes	2 MMR	15–19	Out of country
32	MuVs/Massachusetts.USA/12.16/3[G]	Yes	MF965278	G	MDPH	24.47	27.08	60.79	45701	271871775	Bacterial	V-MM	15232	31	2016-03-25	2016-03-25	Massachusetts.USA	19	Male	Unknown	No	Yes	2 MMR	10–14	None
33	MuVs/Massachusetts.USA/12.16/4[G]	No*	MF965293	G	MDPH	22.51	23.52	644.15	21233	38513605	None	None	8034	3	2016-03-27	2016-03-27	Massachusetts.USA	24	Female	Yes	n/a	Yes	2 MMR	<5	None
34	MuVs/Massachusetts.USA/13.16/[G]	Yes	MF965274	G	MDPH	23.71	25.29	198.72	5140	765562	None	None	15309	216	2016-03-31	2016-03-31	Massachusetts.USA	19	Male	Unknown	No	Yes	2 MMR	15–19	None
35	MuVs/Massachusetts.USA/13.16/2[G]	Yes	MF965267	G	MDPH	26.1	27.8	37.62	37534	216008100	Bacterial	V-MM	15292	61	2016-03-28	2016-03-30	Massachusetts.USA	26	Female	No	n/a	Yes	Unknown	Unknown	None
36	MuVs/Massachusetts.USA/13.16/3[G]	Yes	MF965292	G	MDPH	22.49	22.87	991.12	42748	59254280	Bacterial	V-MM & V-All	15310	650	2016-03-31	2016-03-31	Massachusetts.USA	50	Female	Yes	n/a	Yes	Unknown	Unknown	None
37	MuVs/Massachusetts.USA/13.16/4[G]	Yes	MF965213	G	MDPH	26.16	27.83	36.98	15317	2908252	Bacterial	V-MM & V-All	15304	221	2016-03-31	2016-04-01	Massachusetts.USA	18	Female	No	n/a	Yes	2 MMR	10–14	Out of country
38	MuVs/Massachusetts.USA/11.16/6[G]	Yes	MF965281	G	MDPH	25.44	27.2	55.8	378	1037844	Bacterial	None	15304	167	2016-03-19	2016-03-22	Massachusetts.USA	42	Male	No	No	Yes	Unknown	Unknown	None
39	MuVs/Massachusetts.USA/12.16/5[G]	Yes	MF965290	G	MDPH	30.54	33.55	0.88	3095	136737	Bacterial	V-MM	13431	7	2016-03-20	2016-03-22	Massachusetts.USA	20	Male	Unknown	Unknown	Yes	2 MMR	15–19	None
40	MuVs/Massachusetts.USA/14.16/[G]	Yes	MF965305	G	MDPH	25.31	26.4	95.46	19751	2603003	Bacterial	None	15249	15	2016-04-07	2016-04-08	Massachusetts.USA	19	Female	No	n/a	Yes	2 MMR	10–14	None
41	MuVs/Massachusetts.USA/14.16/2[G]	Yes	MF965239	G	MDPH	20.95	21.81	1990.81	33819	56999495	Bacterial	V-MM	15322	12142	2016-04-06	2016-04-08	Massachusetts.USA	19	Female	Unknown	n/a	Yes	2 MMR	15–19	Out of country
42	MuVs/Massachusetts.USA/15.16/[G]	Yes	MF965214	G	MDPH	21.72	24.03	458.75	57641	13265724	Bacterial	V-All	15311	975	2016-04-11	2016-04-12	Massachusetts.USA	20	Male	Yes	No	Yes	2 MMR	10–14	Out of country
43	MuVs/Massachusetts.USA/14.16/3[G]	Yes	MF965297	G	MDPH	31.83	31.99	2.36	2130	1103012	Bacterial	V-MM	13761	8	2016-04-10	2016-04-12	Massachusetts.USA	33	Male	No	No	Yes	Unknown	Unknown	Out of state
44	MuVs/Massachusetts.USA/15.16/2[G]	Yes	MF965228	G	MDPH	25.26	26.5	88.81	8326	60920870	Bacterial	V-MM	15285	53	2016-04-14	2016-04-14	Massachusetts.USA	19	Male	Yes	No	Yes	Unknown	Unknown	None
45	MuVs/Massachusetts.USA/16.16/[G]	Yes	MF965241	G	MDPH	27.14	27.79	37.87	19359	16073950	Bacterial	V-MM	14871	13	2016-04-17	2016-04-19	Massachusetts.USA	28	Female	Yes	n/a	Yes	2 MMR	20–24	None
46	MuVs/Massachusetts.USA/16.16/2[G]	Yes	MF965257	G	MDPH	22.04	24.72	289.17	4783	14026472	Bacterial	V-MM	15302	70	2016-04-18	2016-04-19	Massachusetts.USA	19	Female	No	n/a	Yes	2 MMR	10–14	None
47	MuVs/Massachusetts.USA/16.16/3[G]	Yes	MF965250	G	MDPH	22.9	26.26	104.35	3601	22119405	None	None	15277	19	2016-04-19	2016-04-19	Massachusetts.USA	18	Female	No	n/a	Yes	2 MMR	10–14	None
48	MuVs/Massachusetts.USA/16.16/4[G]	Yes	MF965242	G	MDPH	22.76	25.86	151.56	6544	14752883	None	None	15296	33	2016-04-19	2016-04-19	Massachusetts.USA	20	Female	Yes	n/a	Yes	2 MMR	10–14	None
49	MuVs/Massachusetts.USA/16.16/5[G]	Yes	MF965209	G	MDPH	20.38	22.63	1161.86	6972	5781432	None	None	15306	507	2016-04-19	2016-04-20	Massachusetts.USA	20	Male	Yes	No	Yes	2 MMR	15–19	None
50	MuVs/Massachusetts.USA/16.16/6[G] (1)	Yes	MF965279	G	MDPH	18.98	26.51	2076.08	–	–	Bacterial	V-All	15317	3672	2016-04-19	2016-04-20	Massachusetts.USA	20	Female	Yes	n/a	Yes	2 MMR	15–19	None
51	MuVs/Massachusetts.USA/16.16/7[G]	Yes	MF965259	G	MDPH	19.58	20.3	5429.59	59273	3536769	None	None	15321	3055	2016-04-20	2016-04-21	Massachusetts.USA	19	Female	Yes	n/a	Yes	2 MMR	10–14	None
52	MuVs/Massachusetts.USA/16.16/8[G]	Yes	MF965245	G	MDPH	26.09	31.53	22.88	–	–	Bacterial	V-MM	14800	14	2016-04-19	2016-04-21	Massachusetts.USA	19	Male	Unknown	No	Yes	2 MMR	15–19	None
53	MuVs/Massachusetts.USA/16.16/9[G]	Yes	MF965251	G	MDPH	19.18	20.28	5500.41	90960	77047770	None	None	15305	176	2016-04-21	2016-04-21	Massachusetts.USA	21	Male	Unknown	No	Yes	Unknown	Unknown	None
54	MuVs/Massachusetts.USA/16.16/10[G]	Yes	MF965255	G	MDPH	26.19	27.29	52.79	10479	29487015	Bacterial	V-MM	15271	34	2016-04-19	2016-04-22	Massachusetts.USA	21	Male	Unknown	No	Yes	None	None	None
55	MuVs/Massachusetts.USA/16.16/11	No	n/a	Unknown	MDPH	30.85	37.45	0.29	6665	317378	Bacterial	V-MM	2965	3	2016-04-19	2016-04-21	Massachusetts.USA	23	Male	No	No	Yes	2 MMR	15–19	None
56	MuVs/Massachusetts.USA/16.16/12[G]	Yes	MF965258	G	MDPH	21.08	26.95	1387.51	16032	96901470	Bacterial	V-All	15311	912	2016-04-21	2016-04-21	Massachusetts.USA	19	Female	Unknown	n/a	Yes	2 MMR	5–9	None
57	MuVs/Massachusetts.USA/16.16/13[G]	Yes	MF965200	G	MDPH	24.19	27.13	58.87	5716	279081	Bacterial	None	13882	7	2016-04-21	2016-04-22	Massachusetts.USA	19	Female	No	n/a	Yes	2 MMR	10–14	None
58	MuVs/Massachusetts.USA/16.16/14[G]	Yes	MF965243	G	MDPH	23.7	25.6	162.02	4524	13216055	Bacterial	V-MM	15301	101	2016-04-21	2016-04-22	Massachusetts.USA	21	Female	Yes	n/a	Yes	2 MMR	15–19	None
59	MuVs/Massachusetts.USA/16.16/15[G]	Yes	MF965233	G	MDPH	25.83	28.65	21.39	12852	3515619	Bacterial	V-MM	15311	421	2016-04-20	2016-04-22	Massachusetts.USA	19	Female	No	n/a	Yes	2 MMR	10–14	None
60	MuVs/Massachusetts.USA/17.16/[G]	Yes	MF965313	G	MDPH	22.52	24.39	359.9	9224	4967354	Bacterial	V-All	15311	1234	2016-04-24	2016-04-25	Massachusetts.USA	22	Male	Yes	No	Yes	2 MMR	15–19	Out of country
61	MuVs/Massachusetts.USA/16.16/16[G]	Yes	MF965206	G	MDPH	24	25.15	218.26	64658	2855176	None	None	15302	111	2016-04-23	2016-04-23	Massachusetts.USA	20	Female	Unknown	n/a	Yes	2 MMR	15–19	None
62	MuVs/Massachusetts.USA/16.16/17[G]	Yes	MF965263	G	MDPH	32.11	31.81	2.69	677	1622003	Bacterial	V-MM	15295	41	2016-04-22	2016-04-24	Massachusetts.USA	18	Female	No	n/a	Yes	2 MMR	10–14	Out of state
63	MuVs/Massachusetts.USA/17.16/2[G]	Yes	MF965316	G	MDPH	22.44	22.82	1024.16	21738	116695550	None	None	15276	12	2016-04-23	2016-04-24	Massachusetts.USA	18	Female	Yes	n/a	Yes	2 MMR	10–14	None
64	MuVs/Massachusetts.USA/16.16/18[G]	Yes	MF965288	G	MDPH	28.2	29	17.32	60117	62999260	Bacterial	V-MM	15289	27	2016-04-24	2016-04-25	Massachusetts.USA	19	Female	Yes	n/a	Yes	2 MMR	10–14	None
65	MuVs/Massachusetts.USA/17.16/3[G]	Yes	MF965296	G	MDPH	23.12	26.63	82.43	182458	59740070	Bacterial	V-MM	15311	1007	2016-04-24	2016-04-25	Massachusetts.USA	20	Female	Unknown	n/a	Yes	2 MMR	<5	None
66	MuVs/Massachusetts.USA/16.16/19[G]	Yes	MF965269	G	MDPH	26.69	28.56	22.8	–	–	Bacterial	V-MM	15304	276	2016-04-21	2016-04-22	Massachusetts.USA	18	Female	Yes	n/a	No	2 MMR	10–14	None
67	MuVs/Massachusetts.USA/17.16/4[G]	Yes	MF965247	G	MDPH	26.26	28.82	19.18	7342	36585703	Bacterial	V-MM	15304	104	2016-04-25	2016-04-26	Massachusetts.USA	20	Male	No	No	Yes	2 MMR	10–14	None
68	MuVs/Massachusetts.USA/16.16/20	No	n/a	Unknown	MDPH	36.4	38.31	0.04	22651	3410041	Bacterial	None	0	0	2016-04-21	2016-04-26	Massachusetts.USA	20	Female	Yes	n/a	Yes	2 MMR	10–14	None
69	MuVs/Massachusetts.USA/17.16/5	No	n/a	Unknown	MDPH	34.11	36.08	0.16	6183	1031501	Bacterial	None	0	0	2016-04-23	2016-04-25	Massachusetts.USA	19	Female	No	n/a	Yes	2 MMR	15–19	None
70	MuVs/Massachusetts.USA/17.16/6[G]	Yes	MF965196	G	MDPH	24.41	ND	ND	8652	51243985	Bacterial	V-MM	15317	2158	2016-04-24	2016-04-25	Massachusetts.USA	19	Female	Yes	n/a	Yes	2 MMR	10–14	None
71	MuVs/Massachusetts.USA/17.16/7[G]	Yes	MF965280	G	MDPH	27.47	30.68	5.59	1136	1434982	Bacterial	V-MM	15301	280	2016-04-26	2016-04-27	Massachusetts.USA	27	Male	Unknown	No	Yes	2 MMR	20–24	None
72	MuVs/Massachusetts.USA/17.16/8[G]	Yes	MF965224	G	MDPH	27.02	31.25	4.14	20243	85444940	Bacterial	None	15293	49	2016-04-24	2016-04-26	Massachusetts.USA	69	Male	Yes	No	Yes	None	None	None
73	MuVs/Massachusetts.USA/16.16/6[G] (2-17.16)	Yes	MF965289	G	MDPH	30.32	30.85	5	77836	34104003	Bacterial	V-All	15271	43	2016-04-19	2016-04-29	Massachusetts.USA	20	Female	Yes	n/a	Yes	2 MMR	15–19	None
74	MuVs/Massachusetts.USA/17.16/10[G]	Yes	MF965276	G	MDPH	27.26	32.81	1.37	3424	1804090	Bacterial	V-All	15309	241	2016-04-30	2016-05-01	Massachusetts.USA	21	Male	Unknown	Unknown	Yes	2 MMR	15–19	Out of country
75	MuVs/Massachusetts.USA/17.16/11[G]	Yes	MF965211	G	MDPH	25.48	28.84	18.97	6282	22243215	Bacterial	V-MM	15307	532	2016-04-29	2016-04-30	Massachusetts.USA	20	Male	No	No	Yes	2 MMR	10–14	None
76	MuVs/Massachusetts.USA/17.16/12[G]	Yes	MF965272	G	MDPH	27.29	34.05	0.6	42877	33841372	Bacterial	None	15301	98	2016-04-30	2016-05-02	Massachusetts.USA	22	Male	Yes	No	Yes	Unknown	Unknown	None
77	MuVs/Massachusetts.USA/17.16/13[G]	Yes	MF965246	G	MDPH	26.92	30.73	5.42	67531	61489380	Bacterial	None	15296	78	2016-04-28	2016-05-02	Massachusetts.USA	21	Female	Unknown	n/a	Yes	2 MMR	15–19	None
78	MuVs/Massachusetts.USA/16.16/21	No	n/a	Unknown	MDPH	32.7	40.78	0.01	27891	15639411	Bacterial	None	1393	1	2016-04-21	2016-05-03	Massachusetts.USA	21	Male	Yes	Yes	Yes	None	None	Out of state
79	MuVs/Massachusetts.USA/18.16/[G]	Yes	MF965265	G	MDPH	25.94	29.64	11.1	14464	11682011	Bacterial	V-MM	15296	155	2016-05-04	2016-05-04	Massachusetts.USA	18	Female	No	n/a	Yes	2 MMR	10–14	None
80	MuVs/Massachusetts.USA/18.16/2[G]	Yes	MF965238	G	MDPH	21.82	22.87	989.11	9818	1501013	None	None	15317	2055	2016-05-05	2016-05-05	Massachusetts.USA	19	Female	Unknown	n/a	Yes	2 MMR	10–14	None
81	MuVs/Massachusetts.USA/18.16/3[G]	Yes	MF965249	G	MDPH	24.63	25.45	178.79	4941	1272354	Bacterial	V-All	15309	913	2016-05-05	2016-05-05	Massachusetts.USA	23	Female	Yes	n/a	Yes	2 MMR	15–19	None
82	MuVs/Massachusetts.USA/18.16/4[G]	Yes	MF965210	G	MDPH	23.32	25.41	183.48	1624	55326705	Bacterial	V-MM	15304	450	2016-05-07	2016-05-08	Massachusetts.USA	20	Male	Yes	No	Yes	2 MMR	15–19	None
83	MuVs/Massachusetts.USA/19.16/[G]	Yes	MF965252	G	MDPH	23.34	26.21	108.35	17177	13070932	Bacterial	V-MM	15304	345	2016-05-08	2016-05-08	Massachusetts.USA	20	Male	Yes	No	Yes	2 MMR	10–14	None
84	MuVs/Massachusetts.USA/19.16/2[G]	Yes	MF965309	G	MDPH	24.05	27.94	34.25	6704	8744985	Bacterial	V-MM	15309	75	2016-05-08	2016-05-09	Massachusetts.USA	22	Male	No	No	Yes	2 MMR	15–19	None
85	MuVs/Massachusetts.USA/19.16/3[G]	Yes	MF965303	G	MDPH	25.53	30.03	8.64	1467	11263620	Bacterial	V-All	15311	436	2016-05-08	2016-05-09	Massachusetts.USA	20	Male	Unknown	No	Yes	2 MMR	15–19	None
86	MuVs/Massachusetts.USA/19.16/4[G]	Yes	MF965304	G	MDPH	21.79	25.41	183.18	38469	32781310	Bacterial	V-MM	15309	809	2016-05-08	2016-05-09	Massachusetts.USA	21	Female	Yes	n/a	Yes	2 MMR	15–19	None
87	MuVs/Massachusetts.USA/19.16/5[G] (1)	Yes	MF965199	G	MDPH	22.25	25.82	139.39	–	–	Bacterial	V-All	15315	1437	2016-05-08	2016-05-09	Massachusetts.USA	22	Female	No	n/a	Yes	2 MMR	20–24	Out of state
88	MuVs/Massachusetts.USA/19.16/6[G]	Yes	MF965315	G	MDPH	26.46	28.92	18.14	541	8528535	Bacterial	V-MM & V-All	15309	195	2016-05-09	2016-05-09	Massachusetts.USA	17	Female	No	n/a	Yes	2 MMR	<5	None
89	MuVs/Massachusetts.USA/19.16/7[G]	Yes	MF965203	G	MDPH	23.6	25.29	198.08	6917	2288674	None	None	15306	253	2016-05-09	2016-05-10	Massachusetts.USA	18	Female	Yes	n/a	Yes	2 MMR	10–14	None
90	MuVs/Massachusetts.USA/19.16/8[G]	Yes	MF965317	G	MDPH	22.42	23.81	531.57	1689	16177383	Bacterial	None	15311	508	2016-05-10	2016-05-11	Massachusetts.USA	19	Male	Yes	No	Yes	2 MMR	15–19	None
91	MuVs/Massachusetts.USA/19.16/9[G]	Yes	MF965230	G	MDPH	25.5	24.93	251.28	984	4692396	Bacterial	None	15311	496	2016-05-13	2016-05-13	Massachusetts.USA	19	Female	Unknown	n/a	Yes	2 MMR	10–14	None
92	MuVs/Massachusetts.USA/19.16/10[G]	Yes	MF965261	G	MDPH	25.25	28.4	25.32	1735	558390	None	None	15304	130	2016-05-12	2016-05-14	Massachusetts.USA	23	Male	Yes	No	Yes	2 MMR	15–19	None
93	MuVs/Massachusetts.USA/19.16/11[G]	Yes	MF965223	G	MDPH	23.01	29.6	11.52	4958	33367715	Bacterial	V-MM	15289	101	2016-05-14	2016-05-14	Massachusetts.USA	21	Female	No	n/a	Yes	1 MMR	15–19	None
94	MuVs/Massachusetts.USA/19.16/5[G] (2-20.16)	Yes	MF965311	G	MDPH	28.3	32.02	2.31	56225	1332865	Bacterial	V-All	15297	70	2016-05-08	2016-05-18	Massachusetts.USA	22	Female	No	n/a	Yes	2 MMR	20–24	Out of state
95	MuVs/Massachusetts.USA/20.16/2[G]	No*	MF965312	G	MDPH	30.02	31.84	2.59	2775	522520	Bacterial	V-MM	10871	5	2016-05-18	2016-05-20	Massachusetts.USA	25	Male	Yes	No	Yes	Unknown	Unknown	None
96	MuVs/Massachusetts.USA/21.16/[G]	Yes	MF965260	G	MDPH	24.01	27.36	50.36	11679	1422268	None	None	15305	165	2016-05-23	2016-05-24	Massachusetts.USA	23	Female	Yes	n/a	Yes	Unknown	Unknown	Out of state
97	MuVs/Massachusetts.USA/21.16/2[G]	No*	MF965231	G	MDPH	29.88	32.52	1.83	2862	9993635	Bacterial	None	6910	3	2016-05-25	2016-05-26	Massachusetts.USA	21	Male	Yes	No	Yes	2 MMR	15–19	None
98	MuVs/Massachusetts.USA/22.16/[G]	Yes	MF965226	G	MDPH	30.18	29.74	10.81	51681	40750915	Bacterial	V-MM	15267	80	2016-06-02	2016-06-03	Massachusetts.USA	19	Male	Yes	No	Yes	Unknown	Unknown	None
99	MuVs/Massachusetts.USA/22.16/2[G]	Yes	MF965237	G	MDPH	24.68	25.59	169.58	15065	1278931	Bacterial	None	15308	204	2016-06-03	2016-06-03	Massachusetts.USA	21	Male	Unknown	No	Yes	2 MMR	<5	None
100	MuVs/Massachusetts.USA/22.16/3[G]	Yes	MF965294	G	MDPH	28.85	30.99	4.7	692	1033929	Bacterial	None	15241	21	2016-06-01	2016-06-03	Massachusetts.USA	27	Female	Yes	n/a	Yes	2 MMR	15–19	None
101	MuVs/Massachusetts.USA/23.16/[G]	No*	MF965314	G	MDPH	35.01	32.95	1.25	2545	761897	Bacterial	V-MM	3732	4	2016-06-11	2016-06-19	Massachusetts.USA	20	Female	Yes	n/a	Yes	None	Unknown	Out of state
102	MuVs/Massachusetts.USA/25.16/1	No	n/a	Unknown	MDPH	37.6	36.45	0.13	3993	2312767	Bacterial	None	2666	2	2016-06-21	2016-06-27	Massachusetts.USA	29	Female	Yes	n/a	Yes	Unknown	Unknown	Out of country
103	MuVs/Massachusetts.USA/27.16/[G]	Yes	MF965202	G	MDPH	25.53	27.47	47.41	12384	14578361	Bacterial	V-MM	15280	44	2016-07-07	2016-07-09	Massachusetts.USA	19	Female	No	n/a	Yes	2 MMR	10–14	Out of country
104	MuVs/Massachusetts.USA/27.16/2[G]	Yes	MF965208	G	MDPH	30.57	30.75	5.36	3291	1269680	Bacterial	None	14494	8	2016-07-08	2016-07-12	Massachusetts.USA	25	Male	Yes	No	Yes	Unknown	Unknown	None
105	MuVs/Massachusetts.USA/28.16/1	No	n/a	Unknown	MDPH	35.82	34.48	0.51	5132	2199217	Bacterial	None	0	0	2016-07-10	2016-07-14	Massachusetts.USA	38	Male	Yes	No	Yes	1 MMR	<5	None
106	MuVs/Massachusetts.USA/11.14/1	No	n/a	Unknown	MDPH	35.06	44.14	0	1178	8739145	Bacterial	None	0	0	2014-03-14	2014-03-19	Massachusetts.USA	18	Male	Yes	Unknown	Yes	Unknown	Unknown	None
107	MuVs/Massachusetts.USA/21.14/1	No	n/a	Unknown	MDPH	32.02	31.82	2.61	853	1284435	Bacterial	V-MM	2650	2	2014-05-18	2014-05-19	Massachusetts.USA	20	Female	No	n/a	Yes	2 MMR	15–19	None
108	MuVs/Massachusetts.USA/21.14/2	No	n/a	Unknown	MDPH	31.45	33.34	1.03	7886	23866125	Bacterial	None	182	2	2014-05-18	2014-05-21	Massachusetts.USA	19	Male	Yes	No	Yes	2 MMR	10–14	Out of state
109	MuVs/Massachusetts.USA/26.15/[G]	Yes	MF965222	G	MDPH	19.51	25.73	148.36	614	1480935	Bacterial	None	15296	69	2015-07-03	2015-07-04	Massachusetts.USA	19	Female	No	n/a	Yes	None	None	Out of country
110	MuVs/Massachusetts.USA/37.15/[G]	Yes	MF965262	G	MDPH	23.06	22.93	952.26	3293	3419965	None	None	15309	508	2015-09-12	2015-09-15	Massachusetts.USA	27	Female	Yes	n/a	Yes	2 MMR	15–19	None
111	MuVs/Massachusetts.USA/52.15/1	No	n/a	Unknown	MDPH	33.62	33.23	1.04	372	2041381	Bacterial	None	42	0	2015-12-27	2015-12-28	Massachusetts.USA	14	Male	No	No	Yes	Unknown	Unknown	Out of state/country
112	MuVs/Massachusetts.USA/30.16/[G]	Yes	MF965299	G	MDPH	26.6	ND	ND	214073	32441615	Bacterial	V-MM	15296	76	2016-07-29	2016-08-01	Massachusetts.USA	19	Male	No	No	Yes	Unknown	Unknown	None
113	MuVs/Massachusetts.USA/33.16/[G]	Yes	MF965295	G	MDPH	26.97	–	–	–	–	Bacterial	V-MM	15290	20	2016-08-19	2016-08-19	Massachusetts.USA	21	Female	No	n/a	Yes	1 MMR	20–24	None
114	MuVs/Massachusetts.USA/37.16/[G]	Yes	MF965284	G	MDPH	24.6	–	–	–	–	Bacterial	V-MM	15315	1289	2016-09-11	2016-09-11	Massachusetts.USA	28	Female	No	n/a	Yes	Unknown	Unknown	Out of country
115	MuVs/Massachusetts.USA/36.16/[G]	No	n/a	Unknown	MDPH	35.77	–	–	–	–	Bacterial	V-MM	2526	3	2016-09-08	2016-09-11	Massachusetts.USA	21	Male	Yes	No	Yes	2 MMR	15–19	Out of country
116	MuVs/Massachusetts.USA/39.16/[G]	Yes	MF965306	G	MDPH	30.19	–	–	–	–	Bacterial	V-MM	15270	22	2016-10-02	2016-10-03	Massachusetts.USA	21	Female	No	n/a	Yes	2 MMR	15–19	Out of state
117	MuVs/Massachusetts.USA/41.16/[G]	No	n/a	Unknown	MDPH	36.33	–	–	–	–	Bacterial	V-MM	871	2	2016-10-14	2016-10-17	Massachusetts.USA	22	Female	No	n/a	Yes	2 MMR	15–19	None
118	MuVs/Massachusetts.USA/42.16/[G]	Yes	MF965301	G	MDPH	23.25	–	–	–	–	Bacterial	V-MM	15315	1895	2016-10-18	2016-10-21	Massachusetts.USA	20	Female	Yes	n/a	Yes	2 MMR	15–19	Out of state
119	MuVs/Massachusetts.USA/43.16/[G]	Yes	MF965236	G	MDPH	27.11	–	–	–	–	Bacterial	V-MM	15311	429	2016-10-23	2016-10-24	Massachusetts.USA	20	Female	Yes	n/a	Yes	2 MMR	15–19	Out of state
120	MuVs/Massachusetts.USA/42.16/2[G]	No	n/a	Unknown	MDPH	36.71	–	–	–	–	Bacterial	V-MM	0	0	2016-10-20	2016-10-24	Massachusetts.USA	18	Male	Yes	No	Yes	2 MMR	10–14	None
121	MuVs/Massachusetts.USA/43.16/2[G]	Yes	MF965283	G	MDPH	26.42	–	–	–	–	Bacterial	V-MM	15304	113	2016-10-24	2016-10-26	Massachusetts.USA	26	Male	No	No	Yes	2 MMR	20–24	Out of state
122	MuVs/Massachusetts.USA/44.16/[G]	Yes	MF965232	G	MDPH	25.37	–	–	–	–	Bacterial	V-MM	15305	199	2016-10-30	2016-10-31	Massachusetts.USA	29	Male	Yes	No	Yes	2 MMR	20–24	None
123	MuVs/Massachusetts.USA/45.16/[G]	Yes	MF965285	G	MDPH	24.19	–	–	–	–	Bacterial	V-MM & V-All	15320	1587	2016-11-09	2016-11-09	Massachusetts.USA	21	Male	Yes	No	Yes	2 MMR	15–19	Out of state
124	MuVs/Massachusetts.USA/45.16/2[G]	Yes	MF965273	G	MDPH	29.48	–	–	–	–	Bacterial	V-MM	15291	44	2016-11-06	2016-11-09	Massachusetts.USA	57	Female	Yes	n/a	Yes	Unknown	Unknown	None
125	MuVs/Massachusetts.USA/45.16/3[G]	Yes	MF965221	G	MDPH	23.78	–	–	–	–	Bacterial	V-MM	15313	748	2016-11-11	2016-11-11	Massachusetts.USA	20	Female	No	n/a	Yes	1 MMR	15–19	None
126	MuVs/Massachusetts.USA/45.16/4[G]	Yes	MF965201	G	MDPH	25.46	–	–	–	–	Bacterial	V-MM	15302	56	2016-11-10	2016-11-11	Massachusetts.USA	21	Male	No	No	Yes	2 MMR	15–19	Out of state
127	MuVs/Massachusetts.USA/46.16/[G]	Yes	MF965282	G	MDPH	23.02	–	–	–	–	Bacterial	V-MM	15307	273	2016-11-13	2016-11-14	Massachusetts.USA	28	Female	No	n/a	Yes	2 MMR	20–24	Out of state
128	MuVs/Massachusetts.USA/45.16/5[G]	Yes	MF965300	G	MDPH	26.43	–	–	–	–	Bacterial	V-MM	14465	11	2016-11-13	2016-11-13	Massachusetts.USA	43	Male	No	No	Yes	Unknown	Unknown	None
129	MuVs/Massachusetts.USA/46.16/2[G]	Yes	MF965212	G	MDPH	21.93	–	–	–	–	Bacterial	V-MM	15284	23	2016-11-14	2016-11-14	Massachusetts.USA	23	Female	Yes	n/a	Yes	2 MMR	15–19	None
130	MuVs/Massachusetts.USA/46.16/3[G]	No*	MF965229	G	MDPH	32.71	–	–	–	–	Bacterial	V-MM	4769	3	2016-10-13	2016-11-14	Massachusetts.USA	20	Female	No	n/a	Yes	2 MMR	15–19	None
131	MuVs/Massachusetts.USA/45.16/6[G]	No	n/a	Unknown	MDPH	36.08	–	–	–	–	Bacterial	V-MM	0	0	2016-11-12	2016-11-14	Massachusetts.USA	28	Female	No	n/a	Yes	Unknown	Unknown	None
132	MuVs/Massachusetts.USA/45.16/7[G]	Yes	MF965271	G	MDPH	29.24	–	–	–	–	Bacterial	V-MM	15286	48	2016-11-11	2016-11-15	Massachusetts.USA	51	Female	Yes	n/a	Yes	Unknown	Unknown	Out of state
133	MuVs/Massachusetts.USA/46.16/4[G]	Yes	MF965217	G	MDPH	24.94	–	–	–	–	Bacterial	V-MM	15311	533	2016-11-15	2016-11-15	Massachusetts.USA	21	Female	No	n/a	Yes	2 MMR	15–19	None
134	MuVs/Massachusetts.USA/46.16/5[G]	Yes	MF965207	G	MDPH	23.55	–	–	–	–	Bacterial	V-MM & V-All	15318	799	2016-11-17	2016-11-17	Massachusetts.USA	28	Male	Yes	No	Yes	Unknown	Unknown	Out of country
135	MuVs/Massachusetts.USA/46.16/6[G]	Yes	MF965204	G	MDPH	31.11	–	–	–	–	Bacterial	V-MM	15268	19	2016-11-16	2016-11-20	Massachusetts.USA	28	Male	No	No	Yes	2 MMR	5–9	Out of state
136	MuVs/Massachusetts.USA/46.16/7[G]	Yes	MF965308	G	MDPH	29.21	–	–	–	–	Bacterial	V-MM & V-All	15309	126	2016-11-15	2016-11-17	Massachusetts.USA	20	Male	Yes	No	Yes	2 MMR	15–19	None
137	MuVs/Massachusetts.USA/47.16/[G]	No*	MF965307	G	MDPH	32.31	–	–	–	–	Bacterial	V-MM	4781	3	2016-11-23	2016-11-26	Massachusetts.USA	20	Female	Unknown	n/a	Yes	Unknown	Unknown	Out of state
138	MuVs/Massachusetts.USA/50.16/[G]	Yes	MF965198	G	MDPH	22.36	–	–	–	–	Bacterial	V-MM	15311	524	2016-12-13	2016-12-14	Massachusetts.USA	20	Female	Yes	n/a	Yes	2 MMR	15–19	None
139	MA/35.15/NEG-1	No	n/a	Unknown	MDPH	ND	–	–	–	–	Bacterial	V-All	496§	14§	2015-08-30	2015-09-03	Massachusetts.USA	16	Female	No	n/a	Yes	2 MMR	10–14	None
140	MA/41.15/NEG-1	No	n/a	Unknown	MDPH	ND	–	–	–	–	Bacterial	V-All	0	0	2015-10-13	2015-10-14	Massachusetts.USA	22	Female	Yes	n/a	Yes	2 MMR	15–19	None
141	MA/45.15/NEG-1	No	n/a	Unknown	MDPH	ND	–	–	–	–	Bacterial	V-All	0	0	2015-11-11	2015-11-12	Massachusetts.USA	23	Female	No	n/a	Yes	2 MMR	10–14	None
142	MA/48.15/NEG-1	No	n/a	Unknown	MDPH	ND	–	–	–	–	Bacterial	V-All	0	0	2015-12-01	2015-12-04	Massachusetts.USA	20	Female	No	n/a	No	2 MMR	10–14	None
143	MA/2.16/NEG-1	No	n/a	Unknown	MDPH	ND	–	–	–	–	Bacterial	V-All	0	0	2016-01-12	2016-01-14	Massachusetts.USA	17	Female	Unknown	n/a	Unknown	Unknown	Unknown	None
144	MA/3.16/NEG-1	No	n/a	Unknown	MDPH	ND	–	–	–	–	Bacterial	V-All	17	0	2016-01-19	2016-01-21	Massachusetts.USA	19	Female	Unknown	n/a	Yes	2 MMR	10–14	Out of state
145	MA/8.16/NEG-1	No	n/a	Unknown	MDPH	ND	–	–	–	–	Bacterial	V-All	257§	9§	2016-02-23	2016-02-23	Massachusetts.USA	20	Male	No	No	Yes	2 MMR	15–19	None
146	MA/9.16/NEG-1	No	n/a	Unknown	MDPH	ND	–	–	–	–	Bacterial	V-All	0	0	2016-02-29	2016-03-01	Massachusetts.USA	18	Female	Unknown	n/a	Yes	2 MMR	10–14	None
147	MA/9.16/NEG-2	No	n/a	Unknown	MDPH	ND	–	–	–	–	Bacterial	V-All	307***	2***	2016-02-29	2016-03-02	Massachusetts.USA	19	Female	Unknown	n/a	Yes	2 MMR	15–19	None
148	MA/10.16/NEG-1	No	n/a	Unknown	MDPH	ND	–	–	–	–	Bacterial	V-All	0	0	2016-03-06	2016-03-08	Massachusetts.USA	21	Female	No	n/a	Yes	Unknown	Unknown	None
149	MA/11.16/NEG-1	No	n/a	Unknown	MDPH	ND	–	–	–	–	Bacterial	V-All	0	0	2016-03-15	2016-03-19	Massachusetts.USA	18	Female	Yes	n/a	Yes	Unknown	Unknown	None
150	MA/11.16/NEG-2	No	n/a	Unknown	MDPH	ND	–	–	–	–	Bacterial	V-All	0	0	2016-03-19	2016-03-23	Massachusetts.USA	25	Female	Unknown	n/a	Yes	Unknown	Unknown	None
151	MA/13.16/NEG-1	No	n/a	Unknown	MDPH	ND	–	–	–	–	Bacterial	V-All	0	0	2016-03-29	2016-03-30	Massachusetts.USA	17	Female	Unknown	n/a	Yes	Unknown	Unknown	None
152	MA/15.16/NEG-1	No	n/a	Unknown	MDPH	ND	–	–	–	–	Bacterial	V-All	0	0	2016-04-12	2016-04-14	Massachusetts.USA	18	Female	No	n/a	Yes	2 MMR	10–14	None
153	MA/18.16/NEG-1	No	n/a	Unknown	MDPH	ND	–	–	–	–	Bacterial	V-All	0	0	2016-05-05	2016-05-05	Massachusetts.USA	26	Female	No	n/a	Yes	1 MMR	25–29	None
154	MA/18.16/NEG-2	No	n/a	Unknown	MDPH	ND	–	–	–	–	Bacterial	V-All	0	0	2016-05-01	2016-05-08	Massachusetts.USA	21	Female	Yes	n/a	Yes	2 MMR	15–19	None
155	MA/19.16/NEG-1	No	n/a	Unknown	MDPH	ND	–	–	–	–	Bacterial	V-All	225§	4§	2016-05-12	2016-05-13	Massachusetts.USA	23	Female	No	n/a	Unknown	2 MMR	10–14	None
156	MA/24.16/NEG-1	No	n/a	Unknown	MDPH	ND	–	–	–	–	Bacterial	V-All	0	0	2016-06-13	2016-06-15	Massachusetts.USA	24	Male	Yes	No	Yes	Unknown	Unknown	None
157	MA/30.16/NEG-1	No	n/a	Unknown	MDPH	ND	–	–	–	–	Bacterial	V-All	0	0	2016-07-24	2016-07-27	Massachusetts.USA	21	Female	No	n/a	Yes	Unknown	Unknown	None
158	MA/39.16/NEG-1	No	n/a	Unknown	MDPH	ND	–	–	–	–	Bacterial	V-All	0	0	2016-09-27	2016-09-28	Massachusetts.USA	18	Female	Unknown	n/a	Yes	2 MMR	10–14	Out of state
159	MA/43.16/NEG-1	No	n/a	Unknown	MDPH	ND	–	–	–	–	Bacterial	V-All	0	0	2016-10-23	2016-11-01	Massachusetts.USA	23	Female	Yes	n/a	Yes	2 MMR	15–19	None
160	MA/47.16/NEG-1	No	n/a	Unknown	MDPH	ND	–	–	–	–	Bacterial	V-All	0	0	2016-11-25	2016-11-26	Massachusetts.USA	21	Female	Yes	n/a	Yes	2 MMR	15–19	Out of state
161	MA/48.16/NEG-1	No	n/a	Unknown	MDPH	ND	–	–	–	–	Bacterial	V-All	0	0	2016-11-29	2016-11-30	Massachusetts.USA	18	Female	No	n/a	Yes	2 MMR	15–19	None
162	MA/48.16/NEG-2	No	n/a	Unknown	MDPH	ND	–	–	–	–	Bacterial	V-All	0	0	2016-12-01	2016-12-02	Massachusetts.USA	25	Female	No	n/a	Yes	Unknown	Unknown	None
163	MA/49.16/NEG-1	No	n/a	Unknown	MDPH	ND	–	–	–	–	Bacterial	V-All	452§	6§	2016-12-04	2016-12-06	Massachusetts.USA	21	Female	Yes	n/a	Yes	2 MMR	15–19	None
164	MA/50.16/NEG-1	No	n/a	Unknown	MDPH	ND	–	–	–	–	Bacterial	V-All	0	0	2016-12-12	2016-12-14	Massachusetts.USA	21	Male	Unknown	No	Yes	2 MMR	15–19	Out of country
165	MA/50.16/NEG-2	No	n/a	Unknown	MDPH	ND	–	–	–	–	Bacterial	V-All	0	0	2016-12-17	2016-12-19	Massachusetts.USA	22	Female	No	n/a	Yes	2 MMR	15–19	None
166	MA/50.16/NEG-3	No	n/a	Unknown	MDPH	ND	–	–	–	–	Bacterial	V-All	0	0	2016-12-16	2016-12-19	Massachusetts.USA	28	Male	Unknown	Unknown	Unknown	Unknown	Unknown	None
167	MA/50.16/NEG-4	No	n/a	Unknown	MDPH	ND	–	–	–	–	Bacterial	V-All	0	0	2016-12-17	2016-12-22	Massachusetts.USA	27	Female	Yes	n/a	Yes	2 MMR	20–24	None
168	MuVs/Massachusetts.USA/52.16/[G]	Yes	MG986382	G	MDPH	26.98	–	–	–	–	Bacterial	V-All	15302	148	2016-12-27	2016-12-27	Massachusetts.USA	19	Female	No	n/a	Yes	2 MMR	10–14	None
169	MuVs/Massachusetts.USA/3.17/1	No	n/a	Unknown	MDPH	35.65	–	–	–	–	Bacterial	V-All	82	0	2017-01-20	2017-01-24	Massachusetts.USA	24	Male	Yes	No	Yes	Unknown	Unknown	None
170	MuVs/Massachusetts.USA/5.17/[G]	Yes	MG986414	G	MDPH	30.28	–	–	–	–	Bacterial	V-All	15182	14	2017-01-30	2017-01-30	Massachusetts.USA	19	Female	No	n/a	Yes	2 MMR	10–14	Out of country
171	MuVs/Massachusetts.USA/6.17/	No	n/a	Unknown	MDPH	32.87	–	–	–	–	Bacterial	V-All	3393	2	2017-02-09	2017-02-13	Massachusetts.USA	18	Male	No	No	Yes	1 MMR	15–19	Out of state
172	MuVs/Massachusetts.USA/7.17/[G]	Yes	MG986422	G	MDPH	23.76	–	–	–	–	Bacterial	V-All	15313	2175	2017-02-13	2017-02-13	Massachusetts.USA	20	Male	No	No	Yes	1 MMR	15–19	Out of state
173	MuVs/Massachusetts.USA/7.17/2[G]	Yes	MG986415	G	MDPH	26.67	–	–	–	–	Bacterial	V-All	15310	435	2017-02-17	2017-02-18	Massachusetts.USA	19	Male	No	No	Yes	2 MMR	15–19	None
174	MuVs/Massachusetts.USA/8.17/[G]	Yes	MG986388	G	MDPH	25.56	–	–	–	–	Bacterial	V-All	15304	205	2017-02-19	2017-02-19	Massachusetts.USA	19	Male	Yes	No	Yes	Unknown	Unknown	None
175	MuVs/Massachusetts.USA/9.17/[G]	Yes	MG986468	G	MDPH	26.51	–	–	–	–	Bacterial	V-All	15313	892	2017-02-27	2017-02-27	Massachusetts.USA	20	Female	No	n/a	Yes	2 MMR	15–19	None
176	MuVs/Massachusetts.USA/10.17/[G]	Yes	MG986424	G	MDPH	27.67	–	–	–	–	Bacterial	V-All	15309	141	2017-03-03	2017-03-06	Massachusetts.USA	21	Male	No	No	Yes	2 MMR	5–9	None
177	MuVs/Massachusetts.USA/9.17/3	No	n/a	Unknown	MDPH	33.78	–	–	–	–	Bacterial	V-All	4449	3	2017-03-01	2017-03-07	Massachusetts.USA	33	Female	No	n/a	Yes	Unknown	Unknown	None
178	MuVs/Massachusetts.USA/10.17/2[G]	Yes	MG986438	G	MDPH	25.57	–	–	–	–	Bacterial	V-All	15315	661	2017-03-09	2017-03-09	Massachusetts.USA	19	Male	Unknown	Unknown	Yes	Unknown	Unknown	None
179	MuVs/Massachusetts.USA/11.17/[G]	Yes	MG986383	G	MDPH	27.14	–	–	–	–	Bacterial	V-All	15309	278	2017-03-12	2017-03-14	Massachusetts.USA	21	Female	No	n/a	Yes	2 MMR	15–19	None
180	MuVs/Massachusetts.USA/10.17/3	No	n/a	Unknown	MDPH	30.03	–	–	–	–	Bacterial	V-All	5498	4	2017-03-11	2017-03-15	Massachusetts.USA	23	Female	No	n/a	Yes	2 MMR	15–19	None
181	MuVs/Massachusetts.USA/12.17/[G]	Yes	MG986425	G	MDPH	26.66	–	–	–	–	Bacterial	V-All	14670	11	2017-03-22	2017-03-24	Massachusetts.USA	21	Female	No	n/a	Yes	2 MMR	15–19	Out of country
182	MuVs/Massachusetts.USA/13.17/[G]	Yes	MG986396	G	MDPH	23.14	–	–	–	–	Bacterial	V-All	15302	106	2017-03-26	2017-03-26	Massachusetts.USA	23	Male	Unknown	Unknown	Yes	2 MMR	15–19	None
183	MuVs/Massachusetts.USA/13.17/2[G]	Yes	MG986393	G	MDPH	21.17	–	–	–	–	Bacterial	V-All	15309	452	2017-03-27	2017-03-28	Massachusetts.USA	48	Female	No	n/a	Yes	Unknown	Unknown	None
184	MuVs/Massachusetts.USA/13.17/3	No	n/a	Unknown	MDPH	28.16	–	–	–	–	Bacterial	V-All	9127	4	2017-03-29	2017-03-30	Massachusetts.USA	48	Male	Yes	Unknown	Yes	Unknown	Unknown	None
185	MuVs/Massachusetts.USA/14.17/[G]	Yes	MG986439	G	MDPH	20.7	–	–	–	–	Bacterial	V-All	15307	293	2017-04-02	2017-04-02	Massachusetts.USA	21	Female	No	n/a	Yes	2 MMR	15–19	None
186	MuVs/Massachusetts.USA/13.17/4	No	n/a	Unknown	MDPH	37.25	–	–	–	–	Bacterial	V-All	0	0	2017-03-31	2017-04-04	Massachusetts.USA	19	Female	No	n/a	Yes	2 MMR	15–19	Out of country
187	MuVs/Massachusetts.USA/14.17/2[G]	Yes	MG986397	G	MDPH	24.87	–	–	–	–	Bacterial	V-All	15295	36	2017-04-07	2017-04-10	Massachusetts.USA	48	Male	Yes	Yes	Yes	Unknown	Unknown	None
188	MuVs/Massachusetts.USA/15.17/	No	n/a	Unknown	MDPH	26.63	–	–	–	–	Bacterial	V-All	11173	5	2017-04-13	2017-04-14	Massachusetts.USA	35	Female	Yes	n/a	Yes	Unknown	Unknown	None
189	MuVs/Massachusetts.USA/17.17/[G]	Yes	MG986435	G	MDPH	21.86	–	–	–	–	Bacterial	V-All	15304	200	2017-04-23	2017-04-23	Massachusetts.USA	21	Male	Unknown	Unknown	Yes	2 MMR	15–19	None
190	MuVs/Massachusetts.USA/18.17/[G]	Yes	MG986384	G	MDPH	25.15	–	–	–	–	Bacterial	V-All	15302	71	2017-05-03	2017-05-04	Massachusetts.USA	20	Female	No	n/a	Yes	None	None	None
191	MuVs/Massachusetts.USA/19.17/[G]	Yes	MG986386	G	MDPH	21.07	–	–	–	–	Bacterial	V-All	15311	539	2017-05-09	2017-05-11	Massachusetts.USA	20	Female	Unknown	n/a	Yes	2 MMR	10–14	None
192	MuVs/Massachusetts.USA/19.17/2[G]	Yes	MG986412	G	MDPH	30.17	–	–	–	–	Bacterial	V-All	15071	13	2017-05-08	2017-05-11	Massachusetts.USA	21	Male	No	No	Yes	2 MMR	15–19	None
193	MuVs/Massachusetts.USA/19.17/3[G]	Yes	MG986459	G	MDPH	24.26	–	–	–	–	Bacterial	V-All	15309	192	2017-05-13	2017-05-14	Massachusetts.USA	32	Male	Yes	Yes	Yes	Unknown	Unknown	None
194	MuVs/Massachusetts.USA/19.17/4[G]	Yes	MG986416	G	MDPH	22.83	–	–	–	–	Bacterial	V-All	15311	501	2017-05-12	2017-05-14	Massachusetts.USA	31	Male	Yes	Yes	Yes	Unknown	Unknown	None
195	MuVs/Massachusetts.USA/21.17/[G]	Yes	MG986445	G	MDPH	24.89	–	–	–	–	Bacterial	V-All	15305	135	2017-05-25	2017-05-26	Massachusetts.USA	39	Male	No	No	Yes	Unknown	Unknown	None
196	MuVs/Massachusetts.USA/22.17/10	No	n/a	Unknown	MDPH	32.31	–	–	–	–	Bacterial	V-All	7740	4	Unknown	2017-05-28	Massachusetts.USA	21	Male	Unknown	Unknown	Unknown	Unknown	Unknown	None
197	MuVs/Massachusetts.USA/21.17/2[G]	Yes	MG986437	G	MDPH	29.14	–	–	–	–	Bacterial	V-All	15213	45	2017-05-26	2017-05-30	Massachusetts.USA	30	Male	Yes	No	Yes	Unknown	Unknown	None
198	MuVs/Massachusetts.USA/22.17/[G]	Yes	MG986400	G	MDPH	24.23	–	–	–	–	Bacterial	V-All	15302	138	2017-05-29	2017-05-30	Massachusetts.USA	24	Female	Yes	n/a	Yes	Unknown	Unknown	None
199	MuVs/Massachusetts.USA/22.17/2[G]	Yes	MG986461	G	MDPH	21.32	–	–	–	–	Bacterial	V-All	15316	637	2017-05-29	2017-05-30	Massachusetts.USA	20	Male	No	No	Yes	2 MMR	15–19	None
200	MuVs/Massachusetts.USA/22.17/3[G]	Yes	MG986402	G	MDPH	29.19	–	–	–	–	Bacterial	V-All	12704	8	2017-05-30	2017-05-30	Massachusetts.USA	41	Female	Yes	n/a	Yes	Unknown	Unknown	None
201	MuVs/Massachusetts.USA/22.17/4[G]	Yes	MG986399	G	MDPH	24.49	–	–	–	–	Bacterial	V-All	15304	205	2017-05-30	2017-05-31	Massachusetts.USA	36	Male	No	No	Yes	Unknown	Unknown	None
202	MuVs/Massachusetts.USA/22.17/5[G]	Yes	MG986427	G	MDPH	27.38	–	–	–	–	Bacterial	V-All	15296	42	2017-05-31	2017-05-31	Massachusetts.USA	25	Male	No	No	Yes	2 MMR	15–19	None
203	MuVs/Massachusetts.USA/22.17/6[G]	Yes	MG986467	G	MDPH	22.97	–	–	–	–	Bacterial	V-All	15309	353	2017-05-30	2017-05-31	Massachusetts.USA	23	Female	No	n/a	Yes	Unknown	Unknown	Out of state
204	MuVs/Massachusetts.USA/22.17/7[G]	Yes	MG986405	G	MDPH	20.56	–	–	–	–	Bacterial	V-All	15311	614	2017-06-02	2017-06-03	Massachusetts.USA	22	Female	Yes	n/a	Yes	2 MMR	15–19	None
205	MuVs/Massachusetts.USA/22.17/11	No	n/a	Unknown	MDPH	33.37	–	–	–	–	Bacterial	V-All	150	1	2017-05-29	2017-06-04	Massachusetts.USA	33	Male	Yes	Yes	Yes	Unknown	Unknown	None
206	MuVs/Massachusetts.USA/22.17/8[G]	Yes	MG986392	G	MDPH	22.44	–	–	–	–	Bacterial	V-All	15310	498	2017-06-02	2017-06-04	Massachusetts.USA	49	Male	Yes	No	Yes	None	None	None
207	MuVs/Massachusetts.USA/22.17/9[G]	Yes	MG986389	G	MDPH	25.37	–	–	–	–	Bacterial	V-All	14878	10	2017-06-03	2017-06-05	Massachusetts.USA	21	Female	No	n/a	Yes	2 MMR	15–19	None
208	MuVs/Massachusetts.USA/22.17/12	No	n/a	Unknown	MDPH	34.1	–	–	–	–	Bacterial	V-All	0	0	2017-06-01	2017-06-05	Massachusetts.USA	17	Female	No	n/a	Yes	None	None	None
209	MuVs/Massachusetts.USA/23.17/[G]	Yes	MG986407	G	MDPH	22.91	–	–	–	–	Bacterial	V-All	15304	151	2017-06-04	2017-06-05	Massachusetts.USA	15	Female	No	n/a	Yes	None	None	None
210	MuVs/Massachusetts.USA/22.17/13	No	n/a	Unknown	MDPH	31.61	–	–	–	–	Bacterial	V-All	82	0	2017-06-01	2017-06-05	Massachusetts.USA	20	Female	No	n/a	Yes	None	None	None
211	MuVs/Massachusetts.USA/22.17/14	No	n/a	Unknown	MDPH	29.26	–	–	–	–	Bacterial	V-All	3915	3	2017-06-02	2017-06-05	Massachusetts.USA	26	Male	Yes	Yes	Yes	Unknown	Unknown	None
212	MuVs/Massachusetts.USA/22.17/15	No	n/a	Unknown	MDPH	36.37	–	–	–	–	Bacterial	V-All	0	0	2017-06-03	2017-06-06	Massachusetts.USA	27	Male	Yes	No	Yes	Unknown	Unknown	Out of state
213	MuVs/Massachusetts.USA/23.17/2[G]	Yes	MG986444	G	MDPH	24.35	–	–	–	–	Bacterial	V-All	15287	28	2017-06-06	2017-06-07	Massachusetts.USA	28	Female	No	n/a	Yes	2 MMR	20–24	None
214	MuVs/Massachusetts.USA/23.17/3	No	n/a	Unknown	MDPH	30.26	–	–	–	–	Bacterial	V-All	5315	3	2017-06-06	2017-06-13	Massachusetts.USA	19	Male	Unknown	Yes	Yes	Unknown	Unknown	Out of country
215	MuVs/Massachusetts.USA/24.17/[G]	Yes	MG986443	G	MDPH	23.26	–	–	–	–	Bacterial	V-All	15307	295	2017-06-13	2017-06-14	Massachusetts.USA	35	Female	Yes	n/a	Yes	Unknown	Unknown	None
216	MuVs/Massachusetts.USA/24.17/2[G]	Yes	MG986448	G	MDPH	22.69	–	–	–	–	Bacterial	V-All	15311	445	2017-06-14	2017-06-14	Massachusetts.USA	41	Female	No	n/a	Yes	Unknown	Unknown	None
217	MuVs/Massachusetts.USA/24.17/5[K]	Yes	MG986430	K	MDPH	24.81	–	–	–	–	Bacterial	V-All	15300	65	2017-06-14	2017-06-16	Massachusetts.USA	48	Male	Unknown	Unknown	Yes	Unknown	Unknown	Out of country
218	MuVs/Massachusetts.USA/24.17/3[G]	Yes	MG986464	G	MDPH	22.16	–	–	–	–	Bacterial	V-All	15310	443	2017-06-17	2017-06-17	Massachusetts.USA	31	Male	Unknown	No	Yes	Unknown	Unknown	None
219	MuVs/Massachusetts.USA/25.17/[G]	Yes	MG986441	G	MDPH	20.58	–	–	–	–	Bacterial	V-All	15315	1737	2017-06-19	2017-06-19	Massachusetts.USA	37	Female	Yes	n/a	Yes	2 MMR	<5	None
220	MuVs/Massachusetts.USA/24.17/4[G]	Yes	MG986428	G	MDPH	23.87	–	–	–	–	Bacterial	V-All	15309	219	2017-06-17	2017-06-19	Massachusetts.USA	50	Male	No	No	Yes	Unknown	Unknown	None
221	MuVs/Massachusetts.USA/25.17/2[G]	Yes	MG986431	G	MDPH	21.07	–	–	–	–	Bacterial	V-All	15304	72	2017-06-18	2017-06-20	Massachusetts.USA	36	Female	Yes	n/a	Yes	Unknown	Unknown	None
222	MuVs/Massachusetts.USA/25.17/3[G]	Yes	MG986421	G	MDPH	22.82	–	–	–	–	Bacterial	V-All	15315	1033	Unknown	2017-06-21	Massachusetts.USA	27	Male	Unknown	Unknown	Unknown	Unknown	Unknown	None
223	MuVs/Massachusetts.USA/25.17/4[G]	Yes	MG986462	G	MDPH	23.42	–	–	–	–	Bacterial	V-All	15306	317	2017-06-19	2017-06-21	Massachusetts.USA	37	Male	No	No	Yes	Unknown	Unknown	None
224	MuVs/Massachusetts.USA/25.17/5[G]	Yes	MG986401	G	MDPH	21.79	–	–	–	–	Bacterial	V-All	15305	227	2017-06-21	2017-06-21	Massachusetts.USA	22	Male	No	No	Yes	2 MMR	15–19	None
225	MuVs/Massachusetts.USA/25.17/8	No	n/a	Unknown	MDPH	34.68	–	–	–	–	Bacterial	V-All	150	1	2017-06-18	2017-06-21	Massachusetts.USA	44	Male	No	No	Yes	Unknown	Unknown	None
226	MuVs/Massachusetts.USA/25.17/6[G]	Yes	MG986404	G	MDPH	27.15	–	–	–	–	Bacterial	V-All	15304	32	2017-06-20	2017-06-21	Massachusetts.USA	22	Male	No	No	Yes	2 MMR	15–19	None
227	MuVs/Massachusetts.USA/25.17/7[G]	Yes	MG986447	G	MDPH	22.34	–	–	–	–	Bacterial	V-All	15304	68	2017-06-21	2017-06-23	Massachusetts.USA	30	Female	Yes	n/a	Yes	None	None	None
228	MuVs/Massachusetts.USA/25.17/9	No	n/a	Unknown	MDPH	34.57	–	–	–	–	Bacterial	V-All	99	0	2017-06-20	2017-06-27	Massachusetts.USA	24	Male	Yes	Yes	Yes	Unknown	Unknown	None
229	MuVs/Massachusetts.USA/26.17/[G]	Yes	MG986408	G	MDPH	23.67	–	–	–	–	Bacterial	V-All	15293	72	2017-06-27	2017-06-29	Massachusetts.USA	33	Male	Yes	Unknown	Unknown	Unknown	Unknown	None
230	MuVs/Idaho.USA/40.14/1	No	n/a	Unknown	CDC	28.4	29.68	22.51	8396516	12974270	Bacterial	V-All	0	0	Unknown	2014-09-29	Idaho.USA	Unknown	Unknown	Unknown	Unknown	Unknown	Unknown	Unknown	Unknown
231	MuVs/Indiana.USA/5.14[G]	Yes	MG986387	G	CDC	17.4	19.33	14403.2	1210526	7528	Bacterial	V-All	15322	11077	Unknown	2014-01-31	Indiana.USA	Unknown	Unknown	Unknown	Unknown	Unknown	Unknown	Unknown	Unknown
232	MuVs/Michigan.USA/12.14[G]	Yes	MG986450	G	CDC	27.4	30.41	14.32	148403	382901	Bacterial	V-All	15186	13	Unknown	2014-03-20	Michigan.USA	Unknown	Unknown	Unknown	Unknown	Unknown	Unknown	Unknown	Unknown
233	MuVs/NewJersey.USA/16.14/2[G]	Yes	MG986442	G	CDC	26.4	27.9	68.07	293857	27165970	Bacterial	V-All	15304	162	Unknown	2014-04-28	NewJersey.USA	Unknown	Unknown	Unknown	Unknown	Unknown	Unknown	Unknown	Unknown
234	MuVs/NewJersey.USA/19.14	No	n/a	Unknown	CDC	26.7	35.2	0.74	262762	22424	Bacterial	V-All	3342	3	Unknown	2014-05-12	NewJersey.USA	Unknown	Unknown	Unknown	Unknown	Unknown	Unknown	Unknown	Unknown
235	MuVs/NewJersey.USA/48.14	No	n/a	Unknown	CDC	35.4	32.78	3.33	45799	15819402	Bacterial	V-All	0	0	Unknown	2014-11-30	NewJersey.USA	Unknown	Unknown	Unknown	Unknown	Unknown	Unknown	Unknown	Unknown
236	MuVs/NewJersey.USA/49.14[G]	Yes	MG986418	G	CDC	26.2	29.31	28.2	237945	942870	Bacterial	V-All	15302	123	Unknown	2014-12-06	NewJersey.USA	Unknown	Unknown	Unknown	Unknown	Unknown	Unknown	Unknown	Unknown
237	MuVs/NewYork/8.14/[G]	Yes	MG986395	G	CDC	23.2	26.88	130.13	212305	11765169	Bacterial	V-All	15304	236	Unknown	2014-02-20	NewYork.USA	Unknown	Unknown	Unknown	Unknown	Unknown	Unknown	Unknown	Unknown
238	MuVs/NewYork/10.14/2[G]	Yes	MG986398	G	CDC	23.7	26.59	154.11	287740	4432610	Bacterial	V-All	15305	191	Unknown	2014-03-03	NewYork.USA	Unknown	Unknown	Unknown	Unknown	Unknown	Unknown	Unknown	Unknown
239	MuVs/NewYork/10.14/3[G]	Yes	MG986436	G	CDC	25.4	27.8	72.52	209229	11633258	Bacterial	V-All	15304	176	Unknown	2014-03-04	NewYork.USA	Unknown	Unknown	Unknown	Unknown	Unknown	Unknown	Unknown	Unknown
240	MuVs/NewYork.USA/50.14	No	n/a	Unknown	CDC	30.7	34.07	1.44	140694	49970860	Bacterial	V-All	9117	4	Unknown	2014-12-13	NewYork.USA	Unknown	Unknown	Unknown	Unknown	Unknown	Unknown	Unknown	Unknown
241	MuVs/NewYork.USA/51.14[G]	Yes	MG986410	G	CDC	26.6	29.92	19.27	198276	330957	Bacterial	V-All	15305	100	Unknown	2014-12-16	NewYork.USA	Unknown	Unknown	Unknown	Unknown	Unknown	Unknown	Unknown	Unknown
242	MuVs/Ohio.USA/11.14/2[G]	Yes	MG986426	G	CDC	21.8	22.76	1686.36	2201987	131748125	Bacterial	V-All	15311	2182	Unknown	2014-03-16	Ohio.USA	Unknown	Unknown	Unknown	Unknown	Unknown	Unknown	Unknown	Unknown
243	MuVs/Ohio.USA/13.14/6[G]	Yes	MG986455	G	CDC	21.5	22.47	2029.14	2793823	293298175	Bacterial	V-All	15311	1815	Unknown	2014-03-26	Ohio.USA	Unknown	Unknown	Unknown	Unknown	Unknown	Unknown	Unknown	Unknown
244	MuVs/Ohio.USA/13.14/7[G]	Yes	MG986446	G	CDC	23.5	25.06	402.41	1697246	138118910	Bacterial	V-All	15311	600	Unknown	2014-03-25	Ohio.USA	Unknown	Unknown	Unknown	Unknown	Unknown	Unknown	Unknown	Unknown
245	MuVs/Ohio.USA/12.14/9[G]	Yes	MG986409	G	CDC	22.8	25.37	331.57	121987	484472	Bacterial	V-All	15311	1153	Unknown	2014-03-21	Ohio.USA	Unknown	Unknown	Unknown	Unknown	Unknown	Unknown	Unknown	Unknown
246	MuVs/Ohio.USA/13.14/10[G]	Yes	MG986451	G	CDC	24.5	27.1	112.53	12407810	48084980	Bacterial	V-All	15297	84	Unknown	2014-03-30	Ohio.USA	Unknown	Unknown	Unknown	Unknown	Unknown	Unknown	Unknown	Unknown
247	MuVs/Ohio.USA/13.14/11	No	n/a	Unknown	CDC	31.2	34.35	1.39	3739540	612467	Bacterial	V-All	5824	4	Unknown	2014-03-29	Ohio.USA	Unknown	Unknown	Unknown	Unknown	Unknown	Unknown	Unknown	Unknown
248	MuVs/Ohio.USA/14.14	No	n/a	Unknown	CDC	31	32.8	3.24	2685037	9403592	Bacterial	V-All	7903	3	Unknown	2014-03-31	Ohio.USA	Unknown	Unknown	Unknown	Unknown	Unknown	Unknown	Unknown	Unknown
249	MuVs/Ohio.USA/16.14/1[G]	Yes	MG986449	G	CDC	23.2	25.15	379.91	1481488	2278003	Bacterial	V-All	15309	487	Unknown	2014-04-15	Ohio.USA	Unknown	Unknown	Unknown	Unknown	Unknown	Unknown	Unknown	Unknown
250	MuVs/Ohio.USA/16.14/2[G]	Yes	MG986390	G	CDC	19.8	20.87	5511.08	3543090	25621689	Bacterial	V-All	15322	6095	Unknown	2014-04-15	Ohio.USA	Unknown	Unknown	Unknown	Unknown	Unknown	Unknown	Unknown	Unknown
251	MuVs/Pennsylvania.USA/51.14[G]	Yes	MG986465	G	CDC	26.9	30.03	18.13	87175	6153460	Bacterial	V-All	15286	39	Unknown	2014-12-16	Pennsylvania.USA	Unknown	Unknown	Unknown	Unknown	Unknown	Unknown	Unknown	Unknown
252	MuVs/Virginia.USA/51.14[G]	Yes	MG986433	G	CDC	29.9	29.82	20.58	15855	47360	Bacterial	V-All	15306	73	Unknown	2014-12-19	Virginia.USA	Unknown	Unknown	Unknown	Unknown	Unknown	Unknown	Unknown	Unknown
253	MuVs/Connecticut.USA/42.15	No	n/a	Unknown	CDC	32.4	35.74	0.61	70124	40470	Bacterial	V-All	1077	2	Unknown	2015-10-16	Connecticut.USA	Unknown	Unknown	Unknown	Unknown	Unknown	Unknown	Unknown	Unknown
254	MuVs/Illinois.USA/26.15/2[G]	Yes	MG986460	G	CDC	24.3	29	34.31	69714	320787	Bacterial	V-All	15299	187	Unknown	2015-06-24	Illinois.USA	Unknown	Unknown	Unknown	Unknown	Unknown	Unknown	Unknown	Unknown
255	MuVs/Missouri.USA/29.15	No	n/a	Unknown	CDC	37.3	ND	ND	15651	1644	Bacterial	V-All	3460	3	Unknown	2015-07-14	Missouri.USA	Unknown	Unknown	Unknown	Unknown	Unknown	Unknown	Unknown	Unknown
256	MuVs/Michigan.USA/4.16[G]	Yes	MG986419	G	CDC	24.9	26.03	219.65	656099	217834150	Bacterial	V-All	15292	66	Unknown	2016-01-26	Michigan.USA	Unknown	Unknown	Unknown	Unknown	Unknown	Unknown	Unknown	Unknown
257	MuVs/Montana.USA/11.16[G]	Yes	MG986420	G	CDC	22.7	24.18	697.43	229011	33079885	Bacterial	V-All	15313	1601	Unknown	2016-03-15	Montana.USA	Unknown	Unknown	Unknown	Unknown	Unknown	Unknown	Unknown	Unknown
258	MuVs/NewHampshire.USA/8.16/1[G]	Yes	MG986434	G	CDC	21.3	23.43	1109	11189477	54098025	Bacterial	V-All	15313	1425	Unknown	2016-02-25	NewHampshire.USA	Unknown	Unknown	Unknown	Unknown	Unknown	Unknown	Unknown	Unknown
259	MuVs/NewHampshire.USA/40.16[G]	Yes	MG986463	G	CDC	24.74	25.88	240.22	557567	38543305	Bacterial	V-All	15311	862	Unknown	2016-10-07	NewHampshire.USA	Unknown	Unknown	Unknown	Unknown	Unknown	Unknown	Unknown	Unknown
260	MuVs/Pennsylvania.USA/19.16[G]	Yes	MG986458	G	CDC	16.1	18.38	26072.6	211609875	2954	Bacterial	V-All	15321	2467	Unknown	2016-05-10	Pennsylvania.USA	Unknown	Unknown	Unknown	Unknown	Unknown	Unknown	Unknown	Unknown
261	MuVs/Georgia.USA/2.17[G]	Yes	MG986466	G	CDC	17.59	16.508	60873.1	91216270	25125	Bacterial	V-All	15322	3817	Unknown	2017-01-12	Georgia.USA	Unknown	Unknown	Unknown	Unknown	Unknown	Unknown	Unknown	Unknown
262	MuVs/Kansas.USA/9.17	No	n/a	Unknown	CDC	25.8	29.221	19.628	407957	191804	Bacterial	V-All	7831	3	Unknown	2017-02-28	Kansas.USA	Unknown	Unknown	Unknown	Unknown	Unknown	Unknown	Unknown	Unknown
263	MuVs/Kansas.USA/9.17/2[G]	Yes	MG986403	G	CDC	24.41	27.802	48.532	2088645	23870	Bacterial	V-All	15304	128	Unknown	2017-02-28	Kansas.USA	Unknown	Unknown	Unknown	Unknown	Unknown	Unknown	Unknown	Unknown
264	MuVs/Kansas.USA/8.17[G]	Yes	MG986456	G	CDC	23.99	ND	ND	113150	250980	Bacterial	V-All	15304	78	Unknown	2017-02-21	Kansas.USA	Unknown	Unknown	Unknown	Unknown	Unknown	Unknown	Unknown	Unknown
265	MuVs/NorthDakota.USA/9.17[G]	Yes	MG986411	G	CDC	Unknown	30.015	11.921	3546773	1324869	Bacterial	V-All	15300	25	Unknown	2017-02-27	NorthDakota.USA	Unknown	Unknown	Unknown	Unknown	Unknown	Unknown	Unknown	Unknown
266	MuVs/Kansas.USA/8.17/4[G]	Yes	MG986432	G	CDC	25.12	25.322	231.318	7694906	7438862	Bacterial	V-All	15308	670	Unknown	2017-02-23	Kansas.USA	Unknown	Unknown	Unknown	Unknown	Unknown	Unknown	Unknown	Unknown
267	MuVs/Kansas.USA/10.17[G]	Yes	MG986429	G	CDC	25.44	27.259	67.901	502606	233512	Bacterial	V-All	15309	115	Unknown	2017-03-10	Kansas.USA	Unknown	Unknown	Unknown	Unknown	Unknown	Unknown	Unknown	Unknown
268	MuVs/Kansas.USA/8.17/5	No	n/a	Unknown	CDC	37.7	35.179	0.54	1547852	887089	Bacterial	V-All	4103	2	Unknown	2017-03-01	Kansas.USA	Unknown	Unknown	Unknown	Unknown	Unknown	Unknown	Unknown	Unknown
269	MuVs/Illinois.USA/14.17[G]	Yes	MG986423	G	CDC	37.2	32.3	3.184	26111	9310	Bacterial	V-All	15304	45	Unknown	2017-04-05	Illinois.USA	Unknown	Unknown	Unknown	Unknown	Unknown	Unknown	Unknown	Unknown
270	MuVs/Illinois.USA/11.17[G]	Yes	MG986454	G	CDC	27.8	26.968	131.376	8332	17341	Bacterial	V-All	15310	955	Unknown	2017-03-18	Illinois.USA	Unknown	Unknown	Unknown	Unknown	Unknown	Unknown	Unknown	Unknown
271	MuVs/Texas.USA/15.17[G]	Yes	MG986391	G	CDC	25.48	26.781	91.907	172130875	1561407	Bacterial	V-All	15176	22	Unknown	2017-04-13	Texas.USA	Unknown	Unknown	Unknown	Unknown	Unknown	Unknown	Unknown	Unknown
272	MuVs/Georgia.USA/13.17[G]	Yes	MG986413	G	CDC	20.74	19.409	9708.64	137695260	40146200	Bacterial	V-All	15299	77	Unknown	2017-03-27	Georgia.USA	Unknown	Unknown	Unknown	Unknown	Unknown	Unknown	Unknown	Unknown
273	MuVs/Kansas.USA/14.17	No	n/a	Unknown	CDC	Unknown	ND	ND	4549468	138900	Bacterial	V-All	11891	5	Unknown	2017-04-06	Kansas.USA	Unknown	Unknown	Unknown	Unknown	Unknown	Unknown	Unknown	Unknown
274	MuVs/Kansas.USA/13.17	No	n/a	Unknown	CDC	25.91	26.383	118.059	177369	49710	Bacterial	V-All	15201	13	Unknown	2017-03-30	Kansas.USA	Unknown	Unknown	Unknown	Unknown	Unknown	Unknown	Unknown	Unknown
275	MuVs/Kansas.USA/13.17/2[G]	Yes	MG986452	G	CDC	26.02	25.706	181.39	3075936	1110067	Bacterial	V-All	15309	600	Unknown	2017-03-29	Kansas.USA	Unknown	Unknown	Unknown	Unknown	Unknown	Unknown	Unknown	Unknown
276	MuVs/Kansas.USA/15.17[G]	Yes	MG986385	G	CDC	28.56	30.462	9.101	2179	150342	Bacterial	V-All	15254	25	Unknown	2017-04-10	Kansas.USA	Unknown	Unknown	Unknown	Unknown	Unknown	Unknown	Unknown	Unknown
277	MuVs/NorthDakota.USA/14.17[G]	Yes	MG986417	G	CDC	Unknown	27.09	75.624	99567	418935	Bacterial	V-All	15305	140	Unknown	2017-04-07	NorthDakota.USA	Unknown	Unknown	Unknown	Unknown	Unknown	Unknown	Unknown	Unknown
278	MuVs/NorthDakota.USA/15.17[G]	Yes	MG986381	G	CDC	Unknown	27.484	58.932	1305049	2784569	Bacterial	V-All	15302	123	Unknown	2017-04-13	NorthDakota.USA	Unknown	Unknown	Unknown	Unknown	Unknown	Unknown	Unknown	Unknown
279	MuVs/Texas.USA/18.17/[G]	Yes	MG986457	G	CDC	24.73	24.183	474.34	3733687	3635342	Bacterial	V-All	15311	581	Unknown	2017-05-05	Texas.USA	Unknown	Unknown	Unknown	Unknown	Unknown	Unknown	Unknown	Unknown
280	MuVs/Texas.USA/18.17/2	No	n/a	Unknown	CDC	25.73	27.917	44.768	36052	267289	Bacterial	V-All	14803	9	Unknown	2017-05-05	Texas.USA	Unknown	Unknown	Unknown	Unknown	Unknown	Unknown	Unknown	Unknown
281	MuVs/Georgia.USA/20.17	No	n/a	Unknown	CDC	Unknown	29.022	22.296	67537	133128	Bacterial	V-All	15271	17	Unknown	2017-05-18	Georgia.USA	Unknown	Unknown	Unknown	Unknown	Unknown	Unknown	Unknown	Unknown
282	MuVs/Georgia.USA/21.17	No	n/a	Unknown	CDC	Unknown	26.248	128.572	161958	42059	Bacterial	V-All	14667	13	Unknown	2017-05-23	Georgia.USA	Unknown	Unknown	Unknown	Unknown	Unknown	Unknown	Unknown	Unknown
283	MuVs/Michigan.USA/24.17	No	n/a	Unknown	CDC	Unknown	ND	ND	90255	88217	Bacterial	V-All	14757	9	Unknown	2017-06-11	Michigan.USA	Unknown	Unknown	Unknown	Unknown	Unknown	Unknown	Unknown	Unknown
284	MuVs/Texas.USA/27.17[G]	Yes	MG986380	G	CDC	29.49	29.632	15.193	723727	1872775	Bacterial	V-All	15295	40	Unknown	2017-07-03	Texas.USA	Unknown	Unknown	Unknown	Unknown	Unknown	Unknown	Unknown	Unknown
285	MuVs/Louisiana.USA/29.17[G]	Yes	MG986394	G	CDC	Unknown	30.102	11.47	232784	465418	Bacterial	V-All	15288	33	Unknown	2017-07-21	Louisiana.USA	Unknown	Unknown	Unknown	Unknown	Unknown	Unknown	Unknown	Unknown
286	MuVs/Indiana.USA/48.16/[G]	Yes	MG986406	G	CDC	Unknown	19.509	9115.19	655098	6444	Bacterial	V-All	15322	10844	Unknown	2016-11-28	Indiana.USA	Unknown	Unknown	Unknown	Unknown	Unknown	Unknown	Unknown	Unknown
287	MuVs/Indiana.USA/49.16/[G]	Yes	MG986440	G	CDC	Unknown	17.149	40833.5	750490	88747	Bacterial	V-All	15322	20029	Unknown	2016-12-12	Indiana.USA	Unknown	Unknown	Unknown	Unknown	Unknown	Unknown	Unknown	Unknown
288	MuVs/Indiana.USA/1.17[G]	Yes	MG986453	G	CDC	Unknown	15.58	109345	809946	47837	Bacterial	V-All	15322	26850	Unknown	2017-01-06	Indiana.USA	Unknown	Unknown	Unknown	Unknown	Unknown	Unknown	Unknown	Unknown
	* A small number of low quality genomes were published on NBCI but not included in the final dataset for this paper
	** We required that samples from the run with evidence of contamination have a median coverage of 20x (in addition to 11,538 unambiguous bases)
	*** Result from run with no evidence of contamination only
	† A sample is marked as having been depleted or captured if this is the case for at least one replicate
	§ Likely contamination from positive control (Enders strain mock sample)
